# Supplementary material for: A genetic screen for suppressors of a hypomorphic allele of Arabidopsis ARGONAUTE1
Source: PubMed Central journal article supplement — Sci Rep. 2014 Jul 2;4:5533. doi: 10.1038/srep05533 (PMC4078309; doi:10.1038/srep05533), 2014-07-02
Supplement: srep05533-s1.pdf [file srep05533-s1.pdf]

**A genetic screen for suppressors of a hypomorphic  
allele of *Arabidopsis ARGONAUTE1***

Rosa Micol-Ponce, Verónica Aguilera and María Rosa Ponce

**Supplementary Information**

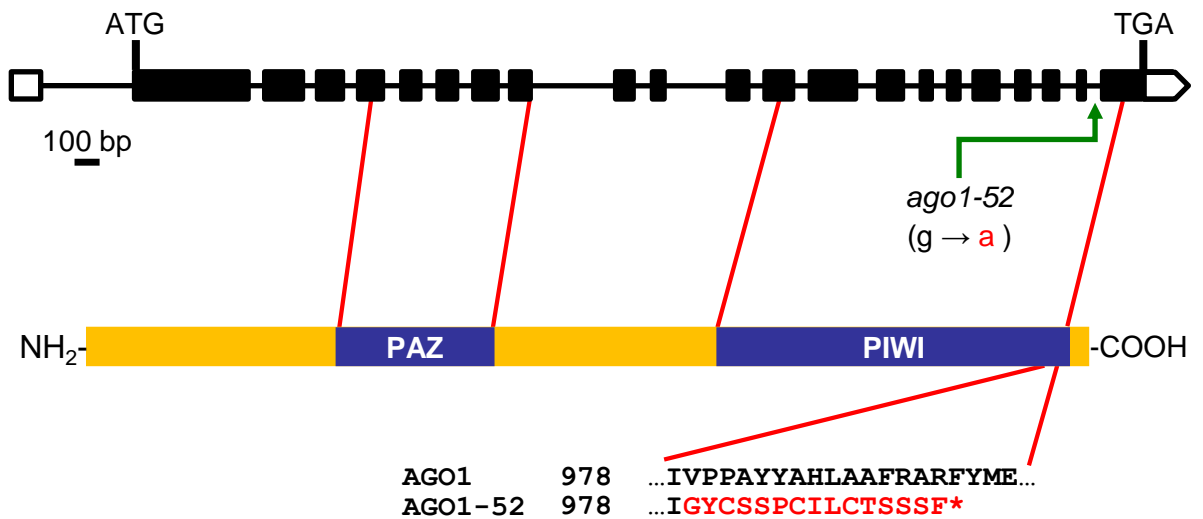

AGO1 DNA            ...ATTGgt...gggatattgtagTTCCCCCTGCATATTATGCACATCTAGCAGCTTTTAG...  
 ago1-52 DNA        ...ATTGgt...aGATATTGTAGTTCCCCCTGCATATTATGCACATCTAGCAGCTTTTAG...

**Figure S1 Schematic representation of the structure of the *AGO1* gene and the *AGO1* protein, with indication of the nature of the *ago1-52* mutation and its impact on the mRNA and protein products of the mutated gene.** Boxes and lines between boxes represent exons and introns, respectively. White boxes represent untranslated 5' and 3' regions. The PAZ and PIWI domains of the *AGO1* protein are shown in blue. Lower case letters are used for intron sequences. Red letters indicate mutated nucleotides or amino acids. The asterisk indicates a stop codon<sup>17</sup>.

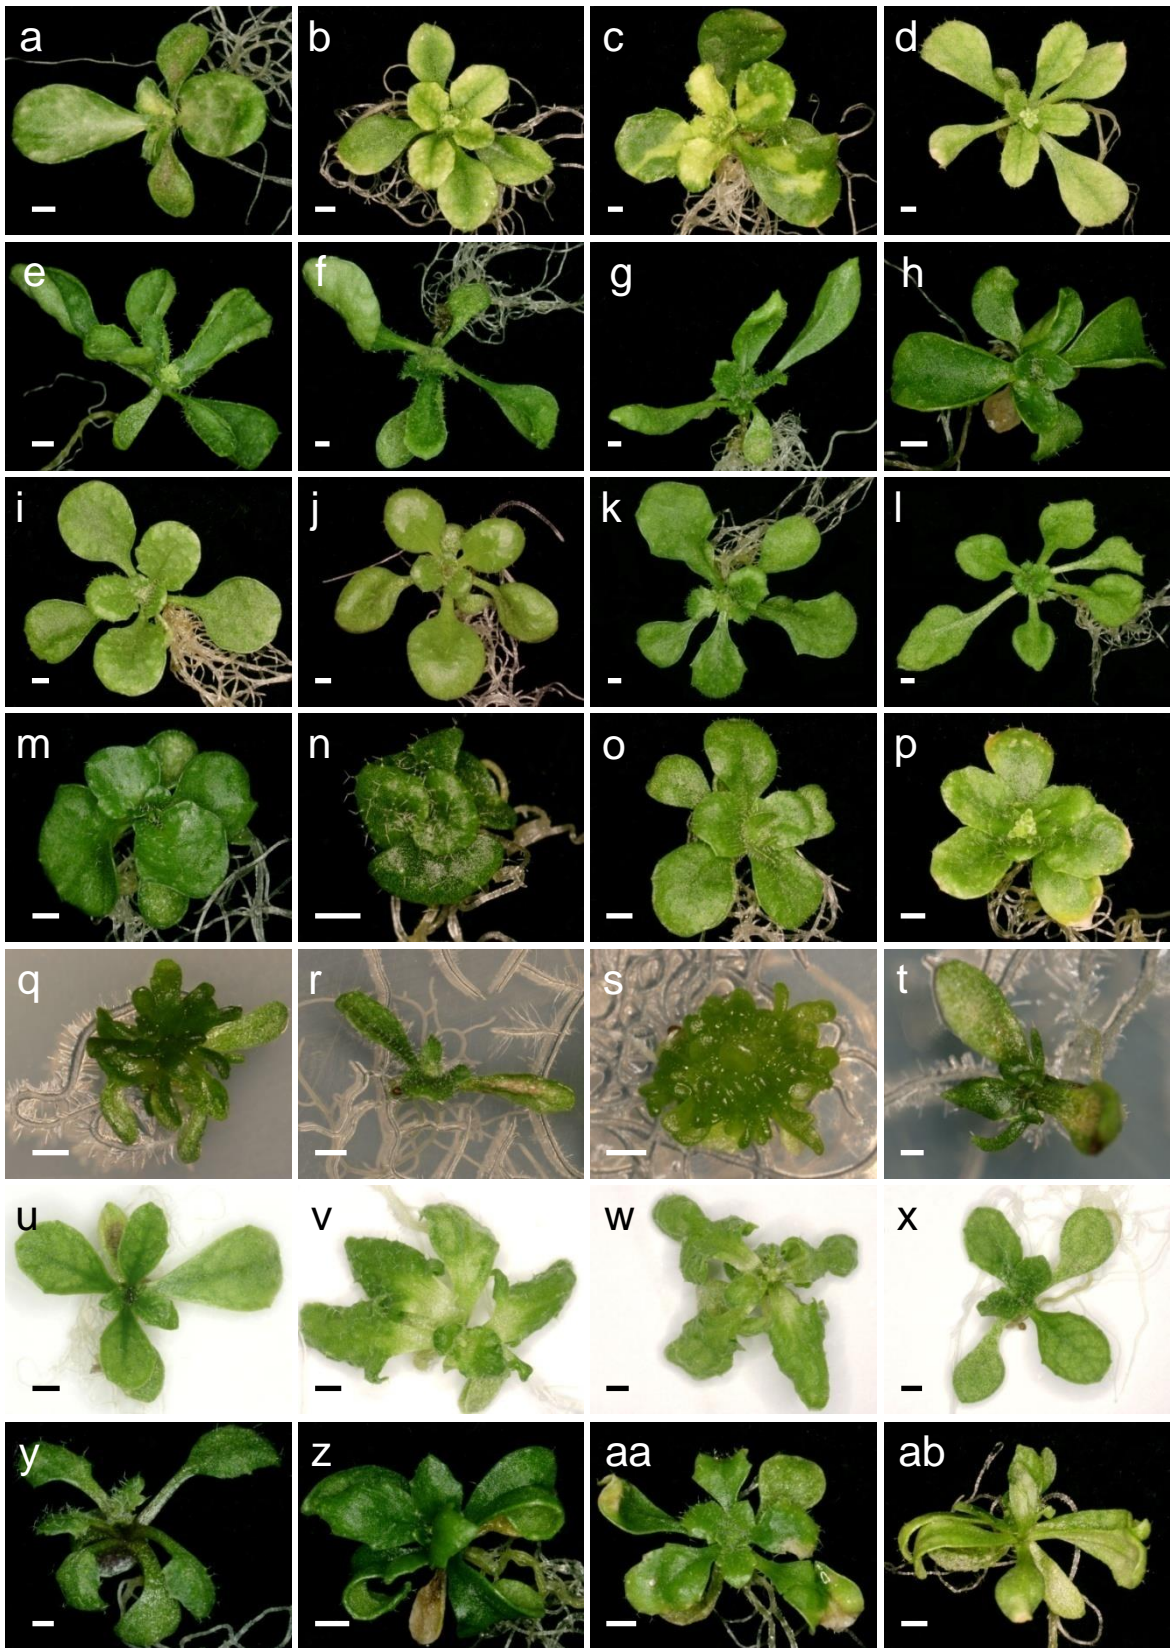

**Figure S2 Double mutants representative of the phenotypic classes defined in this work.** (a-d) Depigmented plants: (a) P5 25.1, (b) P6 9.2, (c) P6 9.3 and (d) P6 23.3. (e-h) Severe Ago1-52 mutant phenotype: (e) P2 3.4, (f) P3 39.1, (g) P3 40.3 and (h) P5 26.1. (i-l) Weak Ago1-52 mutant phenotype: (i) P6 3.2, (j) P6 29.1, (k) P8 6.2 and (l) P8 35.3. (m-p) Compact rosette: (m) P4 48.1, (n) P6 3.6, (o) P6 5.1 and (p) P6 8.1. (q-t) Synergistic phenotypes: (q) P1 6.3, (r) P1 10.13, (s) P1 15.11 and (t) P1 23.4. (u-x) Reticulate leaves: (u) P6 65.1, (v) P8 7.1, (w) P8 16.1 and (x) P8 21.1. (y-ab) Other phenotypes: (y) P3 3.5, (z) P3 28.1, (aa) P3 36.4 and (ab) P6 2.4. Pictures were taken at 21 das. Scale bars: 1 mm.

**Table S1** Expressivity of the mutant phenotypes in M<sub>3</sub> families, classified by phenotypic class

| Phenotypic class         | M <sub>2</sub> double mutants | Expressivity in the M <sub>3</sub> generation |         |          |      |
|--------------------------|-------------------------------|-----------------------------------------------|---------|----------|------|
|                          |                               | constant                                      | reduced | variable | null |
| Severe Ago1-52 phenotype | 42                            | 11                                            | 4       | 18       | 9    |
| Weak Ago1-52 phenotype   | 93                            | 21                                            | 6       | 39       | 27   |
| Compact rosette          | 25                            | 3                                             | 2       | 7        | 13   |
| Depigmented plants       | 34                            | 8                                             | 4       | 14       | 8    |
| Reticulate leaves        | 48                            | 45                                            | 0       | 2        | 1    |
| Other phenotypes         | 60                            | 4                                             | 5       | 24       | 27   |
| Total                    | 302                           | 92                                            | 21      | 104      | 85   |

Values indicate the number of individuals of each type.

**Table S2** Phenotypic segregation in the F<sub>2</sub> progeny of several *mas ago1-52* × *Ler* backcrosses

| <i>mas ago1-52</i><br>line backcrossed | Phenotypic classes in the F <sub>2</sub> |                                                   |         |                                        |                    |                        |                 |
|----------------------------------------|------------------------------------------|---------------------------------------------------|---------|----------------------------------------|--------------------|------------------------|-----------------|
|                                        | WT <sup>a</sup>                          | Putative <i>mas</i><br>single mutant <sup>b</sup> | Ago1-52 | Putative<br>double mutant <sup>c</sup> | Lethal             |                        | Other           |
|                                        |                                          |                                                   |         |                                        | seeds <sup>d</sup> | seedlings <sup>e</sup> | phenotypes      |
| P1 5.33 ( <i>mas1</i> ) <sup>h</sup>   | 122                                      | 0                                                 | 16      | 27                                     |                    |                        |                 |
| P2 11.1 ( <i>mas2</i> ) <sup>i</sup>   | 121                                      | 0                                                 | 8       | 14                                     |                    |                        |                 |
| P4 22.2 <sup>j</sup>                   | 107                                      | 0                                                 | 3       | 12                                     | 15                 |                        | 11 <sup>f</sup> |
| P5 11.1 <sup>k</sup>                   | 113                                      | 0                                                 | 28      | 3                                      | 3                  |                        | 17 <sup>f</sup> |
| P7 13.1 ( <i>mas7</i> ) <sup>l</sup>   | 160                                      | 26                                                | 13      | 27                                     | 62                 | 22                     |                 |
| P7 23.1 <sup>m</sup>                   | 284                                      | 14                                                | 13      | 77                                     |                    |                        | 18 <sup>g</sup> |
| P7 26.1 ( <i>mas4</i> ) <sup>n</sup>   | 125                                      | 20                                                | 31      | 22                                     | 20                 | 18                     | 9 <sup>g</sup>  |
| P8 14.1 ( <i>mas3</i> ) <sup>o</sup>   | 308                                      | 0                                                 | 49      | 101                                    |                    |                        |                 |
| P8 25.1 ( <i>mas5</i> ) <sup>p</sup>   | 136                                      | 13                                                | 14      | 24                                     |                    | 54                     |                 |

Values indicate the number of plants from each phenotypic class. <sup>a</sup>Phenotypically wild type class, including *MAS/MAS;AGO1/-* plants. If the *mas* mutation was recessive or dominant but had no morphological phenotype on its own, the *MAS/mas;AGO1/-* plants would also be included in this class. The *mas/mas;AGO1/-* plants would also be included in this class if the *mas* mutation is recessive but has no phenotype on its own. <sup>b</sup>Plants that share some phenotypes with the putative double mutants but not with *ago1-52*. <sup>c</sup>Plants that show a partially suppressed Ago1-52 phenotype. <sup>d</sup>Seeds exhibiting no or abortive germination. <sup>e</sup>Seedlings in which only the cotyledons and the first pair of leaves expand. <sup>f</sup>Plants with mutant phenotypes different among themselves and from that of *ago1-52*. <sup>g</sup>Plants with a phenotype other than that observed in M<sub>2</sub> and M<sub>3</sub>. <sup>h-p</sup>See Figure <sup>h</sup>3d, <sup>i</sup>3e, <sup>j</sup>3f, <sup>k</sup>3g, <sup>l</sup>3j, <sup>m</sup>3l, <sup>n</sup>3n, <sup>o</sup>3q and <sup>p</sup>3r.

**Table S3** Low-resolution mapping of *MAS1*, *MAS2* and *MAS3*

| Marker      | Chromosome - Physical map position (bp) | Chromosomes studied |             |             | Recombination frequency ( $r \pm S$ ) <sup>a</sup> |                   |                   |
|-------------|-----------------------------------------|---------------------|-------------|-------------|----------------------------------------------------|-------------------|-------------------|
|             |                                         | <i>MAS1</i>         | <i>MAS2</i> | <i>MAS3</i> | <i>MAS1</i>                                        | <i>MAS2</i>       | <i>MAS3</i>       |
| nga59       | 1 - 2,768,000                           | 116                 | 84          | 76          | 35.34±4.44                                         | 50.00±5.46        | 32.89±5.39        |
| JV18/19     | 1 - 5,160,595                           | 116                 | 84          | 54          | <b>24.14±3.97</b>                                  | 31.71±5.14        | 38.89±6.63        |
| AthZFPG     | 1 - 8,727,056                           | 104                 | 84          | 50          | <b>16.35±3.63</b>                                  | <b>21.43±4.48</b> | 38.00±6.86        |
| SNP10026    | 1 - 11,562,061                          | 100                 | 74          | 74          | <b>11.00±3.13</b>                                  | <b>20.27±4.67</b> | 36.49±5.60        |
| F1L21       | 1 - 15,993,202                          | 116                 | 84          | 74          | <b>6.03±2.21</b>                                   | <b>8.33±3.02</b>  | <b>27.03±5.16</b> |
| nga128      | 1 - 20,695,113                          | 116                 | 84          | 76          | <b>15.52±3.36</b>                                  | <b>8.33±3.02</b>  | 31.58±5.33        |
| SNP10490    | 1 - 24,344,448                          | 116                 | 84          | 76          | 23.28±3.92                                         | 20.24±4.38        | 30.26±5.27        |
| nga111      | 1 - 27,418,736                          | 116                 | 84          | 76          | 34.48±4.41                                         | 42.86±5.40        | 25.00±4.97        |
| nga1145     | 2 - 682,624                             | 116                 | 84          | 74          | 30.17±4.26                                         | 47.62±5.45        | 48.65±5.81        |
| SNP8895     | 2 - 7,860,251                           | 116                 | 84          | 74          | <b>12.93±3.12</b>                                  | 46.43±5.44        | 51.35±5.81        |
| nga1126     | 2 - 11,670,000                          | 110                 |             |             | <b>3.64±1.78</b>                                   |                   |                   |
| nga168      | 2 - 16,240,385                          | 116                 | 84          | 74          | <b>18.10±3.58</b>                                  | 44.05±5.42        | 64.86±5.55        |
| nga126      | 3 - 3,713,432                           | 112                 | 76          | 74          | 48.21±4.72                                         | 55.26±5.70        | 47.30±5.80        |
| MYF24       | 3 - 6,466,772                           | 98                  | 50          | 74          | 43.88±5.00                                         | 56.00±7.02        | 43.24±5.76        |
| AthGAPab    | 3 - 9,796,450                           | 116                 | 84          | 76          | 46.55±4.63                                         | 58.33±5.38        | 46.05±5.72        |
| T32N15      | 3 - 16,986,906                          | 108                 | 84          | 74          | 41.67±4.74                                         | 47.62±5.45        | 50.00±5.81        |
| F28P10      | 3 - 21,398,175                          | 96                  | 82          | 62          | 51.04±5.10                                         | 47.56±5.52        | 50.00±6.35        |
| nga6        | 3 - 23,040,009                          | 114                 | 84          | 74          | 42.11±4.62                                         | 44.05±5.42        | 48.65±5.81        |
| nga1111     | 4 - 5,074,681                           | 116                 | 84          | 76          | 40.52±4.56                                         | <b>14.29±3.82</b> | <b>11.84±3.71</b> |
| AthF28J12.3 | 4 - 9,166,451                           | 112                 | 84          | 76          | 40.18±4.63                                         | 30.95±5.04        | <b>6.58±2.84</b>  |
| nga1139     | 4 - 15,408,641                          | 116                 | 84          | 76          | 43.10±4.60                                         | 42.86±5.40        | <b>18.42±4.45</b> |
| AthCTR1     | 5 - 979,763                             | 104                 |             |             | 49.04±4.90                                         |                   |                   |
| nga151      | 5 - 4,669,932                           | 106                 | 76          | 76          | 48.11±4.85                                         | 46.05±5.72        | 43.42±5.69        |
| nga76       | 5 - 10,375,531                          | 104                 |             | 74          | 50.96±4.90                                         |                   | 39.19±5.67        |
| AthPHYC     | 5 - 13,721,807                          | 104                 | 84          | 56          | 46.15±4.89                                         | 50.00±5.46        | 46.43±6.66        |
| MNF13       | 5 - 17,908,612                          | 116                 | 84          | 52          | 49.14±4.64                                         | 50.00±5.46        | 40.38±6.80        |
| MNB8        | 5 - 23,120,770                          | 114                 | 84          | 76          | 51.75±4.68                                         | 52.38±5.45        | 42.11±5.66        |
| MUA2        | 5 - 23,956,127                          | 106                 | 84          | 74          | 53.77±4.84                                         | 50.00±5.46        | 54.05±5.79        |
| K8K14       | 5 - 28,518,213                          | 114                 | 84          | 74          | 53.51±4.67                                         | 48.81±5.45        | 56.76±5.76        |

Genotyping results obtained for mapping populations of F<sub>2</sub> plants derived from crosses involving the wild type Col-0 and a *mas ago1-52* double mutant with a *Ler* genetic background. *r*: recombination frequency. *S*: Standard error of recombination frequency. Physical map positions of the markers were obtained from the Munich Information Center for Protein Sequences (MIPS) Arabidopsis database. Data corresponding to  $r < 30\%$  are highlighted in bold and were considered unequivocal evidence of linkage. The linkage found for chromosome 1 corresponds to the *ago1-52* mutation, whose physical map position is 17,885,633 bp.
